# Supplementary material for: Molecular Characterization of 4/91 Infectious Bronchitis Virus Leading to Studies of Pathogenesis and Host Responses in Laying Hens
Source: MDPI journal article supplement (doi:10.3390/pathogens10050624), 2021-05-19
Supplement: s1 [file s1]

Article

# Molecular Characterization of 4/91 Infectious Bronchitis Virus Leading to Studies of Pathogenesis and Host Responses in Laying Hens

Shahnas M. Najimudeen <sup>1,†</sup>, Mohamed S. H. Hassan <sup>1,2,†</sup>, Dayna Goldsmith <sup>1</sup>, Davor Ojkic <sup>3</sup>, Susan C. Cork <sup>1</sup>, Martine Boulianne <sup>4</sup> and Mohamed Faizal Abdul-Careem <sup>1,\*</sup>

<sup>1</sup> Department of Ecosystem and Public Health, Faculty of Veterinary Medicine, University of Calgary, Calgary, AB T2N 4N1, Canada; fathimashahnas.moham@ucalgary.ca (S.M.N.); msh.hassan@ucalgary.ca (M.S.H.H.); dayna.goldsmith@ucalgary.ca (D.G.); sccork@ucalgary.ca (S.C.C.)

<sup>2</sup> Department of Poultry Diseases, Faculty of Veterinary Medicine, Assiut University, Assiut 71515, Egypt

<sup>3</sup> Animal Health Laboratory, University of Guelph, Guelph, ON N1G 2W1, Canada; dojkic@uoguelph.ca

<sup>4</sup> Department of Clinical Sciences, Faculty of Veterinary Medicine, University of Montréal, St. Hyacinthe, QC, J2S 2M2, Canada; martine.boulianne@umontreal.ca

\* Correspondence: faizal.abdulcareem@ucalgary.ca; Tel.: +1-403-220-4462; Fax: +1-403-210-974

† Equal contribution.

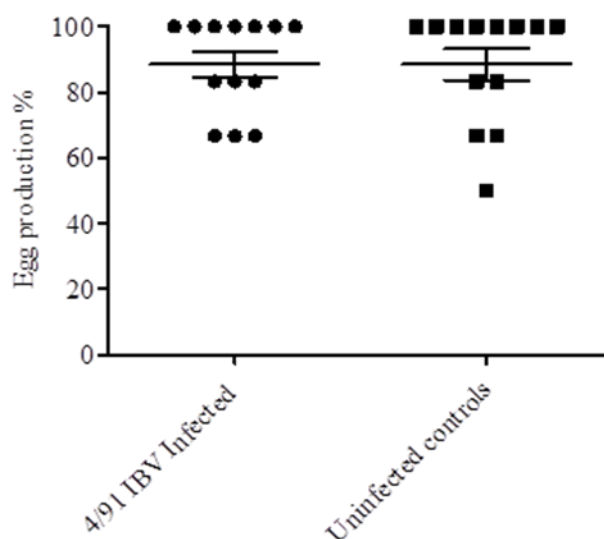

**Supplementary Figure 1.** Egg production following infection with Canadian 4/91 IBV isolate, IBV/Ck/Can/17-038913. The percent daily egg production by infected and uninfected chickens is shown. Mann Whitney U test was used to compare the difference in egg production each day ( $P > 0.05$ ). The error bars represent the SEM.

**Supplementary Table 1.** List of reference IBV sequences used in the S1 sequence analysis

| Reference sequence         | GenBank Accession # | Origin      |
|----------------------------|---------------------|-------------|
| N1/08                      | JN176213            | Australia   |
| V18/91                     | U29521              | Australia   |
| N4/02                      | DQ059618            | Australia   |
| N5/03                      | DQ059619            | Australia   |
| N1/62                      | U29522              | Australia   |
| V2-02                      | DQ490215            | Australia   |
| B1648                      | X87238              | Belgium     |
| IBV/Brasil/351/1984        | GU393339            | Brazil      |
| Qu_mv                      | AF349621            | Canada      |
| Qu16                       | AF349620            | Canada      |
| IBV_SES_15AB-01            | MH539771            | Canada      |
| IBV/Ck/Can/18-049707       | MN512438            | Canada      |
| 48SD-96VI                  | KC577388            | China       |
| QXIBV                      | AF193423            | China       |
| CK/CH/LLN/111169           | KF411040            | China       |
| Connecticut vaccine        | KF696629            | China       |
| QS                         | JQ250818            | China       |
| SDW                        | DQ070840            | China       |
| SDIB781/2012               | KF007209            | China       |
| TC07-2                     | GQ265948            | China       |
| SAIBK                      | DQ288927            | China       |
| CK/CH/JX/JA09-1            | HQ018890            | China       |
| ck/CH/LHLJ/110664          | JQ739299            | China       |
| GX2-98                     | AY251816            | China       |
| ck/CH/LSD/110857           | JQ739375            | China       |
| 4/91 vaccine               | KF377577            | China       |
| CK/CH/LDL/97I              | EF030995            | China       |
| CH GX NN1111               | KC692317            | China       |
| Q1                         | AF286302            | China       |
| ck/CH/LGX/111119           | KX640829            | China       |
| gammaCoV/ck/China/I0114/14 | KY407556            | China       |
| gammaCoV/ck/China/I0118/14 | KY407558            | China       |
| Eg/1265B/2012              | KC533682            | Egypt       |
| It/497/02                  | DQ901377            | Italy       |
| IZO 28/86                  | KJ941019            | Italy       |
| IBV422                     | KF809791            | India       |
| V25                        | KF757451            | India       |
| Variant 1                  | AF093795            | Israel      |
| IS/1201                    | DQ400359            | Israel      |
| Variant 2                  | AF093796            | Israel      |
| JP8443                     | AY296745            | Japan       |
| K620/02                    | FJ807944            | South Korea |
| SNU8067                    | JQ977697            | South Korea |
| A                          | AF151953            | New Zealand |
| D                          | AF151956            | New Zealand |
| K43                        | AF151958            | New Zealand |

|                 |          |                 |
|-----------------|----------|-----------------|
| D274            | X15832   | The Netherlands |
| V1397           | M21968   | The Netherlands |
| D1466           | M21971   | The Netherlands |
| BL-56           | AF352831 | Mexico          |
| Moroccan-G/83   | EU914938 | Morocco         |
| NGA/N544/2006   | FN182269 | Nigeria         |
| NGA/324/2006    | FN182277 | Nigeria         |
| NGA/295/2006    | FN182276 | Nigeria         |
| NER/28/2007     | FN182272 | Niger           |
| RF/01/02        | AJ441314 | Russia          |
| Spain/00/336    | DQ386098 | Spain           |
| Spain/98/313    | DQ064808 | Spain           |
| TP/64           | AY606320 | Taiwan          |
| 3381/06         | GQ229245 | Taiwan          |
| UK/L-633/04     | DQ901376 | United Kingdom  |
| UK/7/91         | Z83975   | United Kingdom  |
| 6/82            | X04723   | United Kingdom  |
| FR-85131-85     | AJ618985 | United Kingdom  |
| Beaudette       | M95169   | USA             |
| M41             | AY561711 | USA             |
| Conn46 1996     | FJ904716 | USA             |
| Iowa97          | GU393337 | USA             |
| Gray            | L14069   | USA             |
| JMK             | L14070   | USA             |
| PA/5344/98      | AY789947 | USA             |
| Holte           | L18988   | USA             |
| L905            | JQ964070 | USA             |
| SE17            | M99484   | USA             |
| ARK99           | M99482   | USA             |
| ArkDPI          | AF006624 | USA             |
| CAL99           | DQ912831 | USA             |
| PA/Wolgemuth/98 | AF305595 | USA             |
| CA/1737/04      | EU925393 | USA             |
| DMV/5642/06     | EU694402 | USA             |
| GA/13485/2013   | KP085597 | USA             |
| GA/13384/2013   | KM660635 | USA             |
| GA08            | GU301925 | USA             |
| DE/072/92       | U77298   | USA             |
| GA/13055/00     | AF338719 | USA             |
| CU82792         | AF317214 | USA             |
